# Supplementary material for: Preparation of a freestanding, macroporous reduced graphene oxide film as an efficient and recyclable sorbent for oils and organic solvents
Source: Royal Society of Chemistry journal article supplement (doi:10.1039/c3ta10663b), 2013-01-01
Supplement: c3ta10663b.pdf [file c3ta10663b.pdf]

# Supporting Information

“Preparation of a freestanding, macroporous reduced graphene oxide film as an efficient and recyclable sorbent for oils and organic solvents”

Seung Jae Yang, Jong Hun Kang, Haesol Jung, Taehoon Kim, and Chong Rae Park\*

Carbon Nanomaterials Design Laboratory, Global Research Laboratory (GRL), Research Institute of Advanced Materials (RIAM), and Department of Materials Science and Engineering, Seoul National University, Seoul 151-744, Republic of Korea.

\*Corresponding author. Tel: (+82) 2-880-8030. Fax: (+82) 2-885-1748.

E-mail address: crpark@snu.ac.kr

### Supplementary SEM Micrographs at Various Magnification Levels

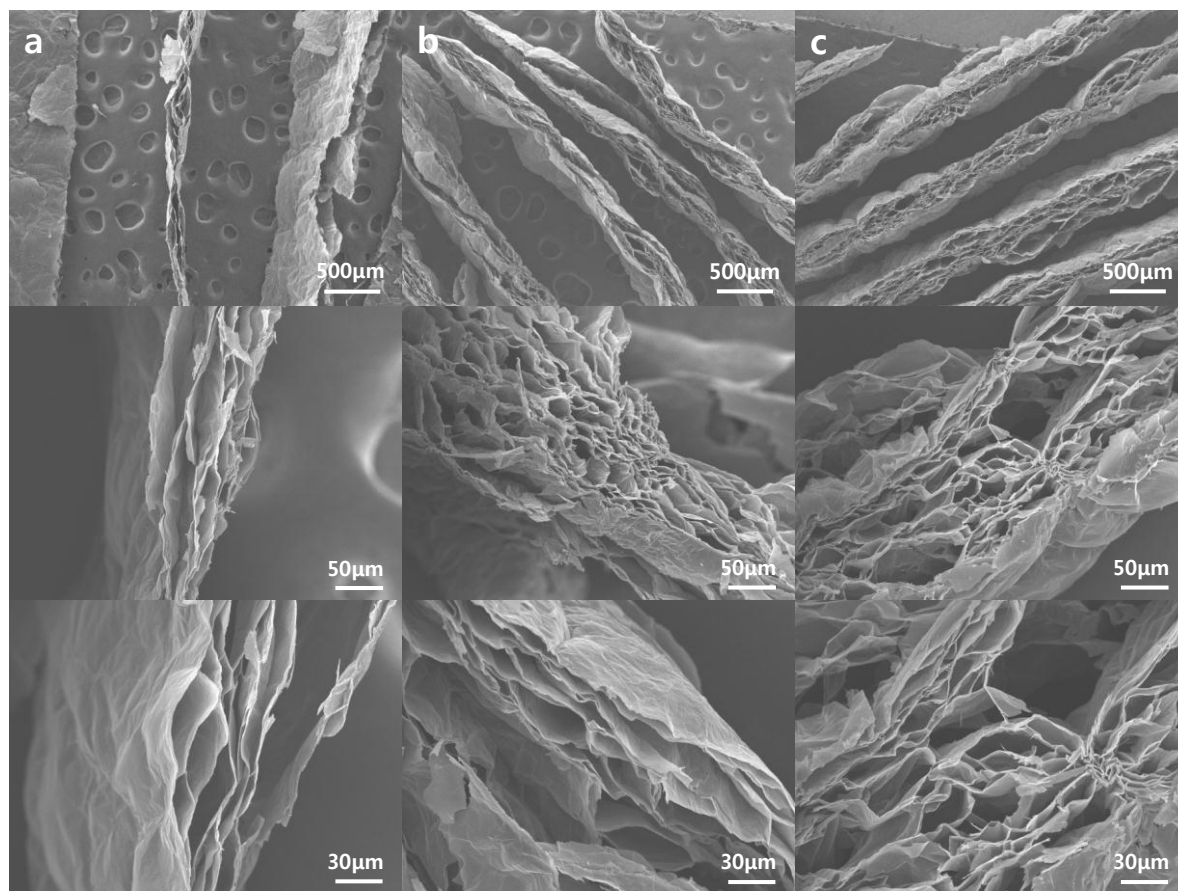

**Figure S1.** Cross-sectional SEM micrographs of (a) rGOF-05, (b) rGOF-20 and (c) rGOF-80 samples at the magnification of X35 (top), X300 (middle) and X500 (bottom).

### Specification of Graphite (Starting Material)

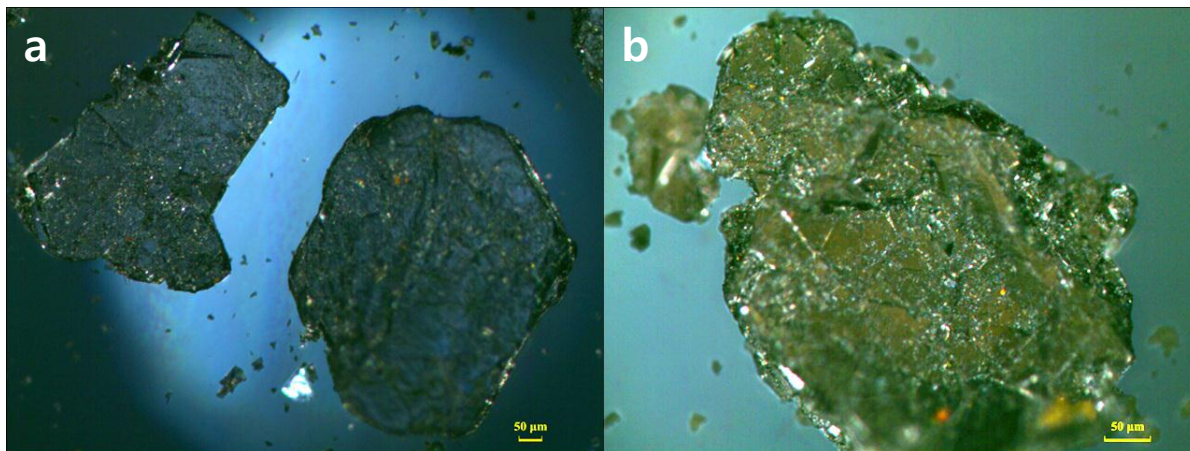

**Figure S2.** Optical microscope images of graphite used as the starting material for GO synthesis in this work.

Natural graphite used in this work was purchased from Sigma-Aldrich. As seen in Figure S2, the size of each individual graphite platelet is approximately 500μm, roughly corresponding to No. 20 to 30 ASTM mesh size.
